# Supplementary material
Source: PubMed Central journal article supplement (PMC5473219)
Supplement: 10.1074_M116.773226_jbc.M116.773226-9.pdf [file 10.1074_M116.773226_jbc.M116.773226-9.pdf]

**Table S1. Oligonucleotides for construction of expression plasmids and mutagenesis**

|                                                    |                                                  |
|----------------------------------------------------|--------------------------------------------------|
| Cyclin D1 upstream sense primer:                   | 5' AC <u>AGATCT</u> AT GGAACACCAG CTCCTGTG 3'    |
| Cyclin D1 downstream antisense primer:             | 5' AAG <u>TCGACG</u> ATGTCCACGTCCCGCACGTC 3'     |
| Cyclin D1 <sup>K112E</sup> antisense primer:       | 5' CATCTCAGAG GCCACGAACA 3'                      |
| Cyclin D1 <sup>K112E</sup> sense primer:           | 5' GTGGCCTCTG AGATGAAGGA GACC 3'                 |
| Cyclin D1 <sup>K114E</sup> antisense primer:       | 5' CTCCTCCATCTTAGAGGCCA 3'                       |
| Cyclin D1 <sup>K114E</sup> sense primer:           | 5' TAAGATGGAGGAGACCATCC 3'                       |
| Cyclin D1 <sup>K112, 114E</sup> antisense primer:  | 5' CATCTCAGAG GCCACGAACA 3'                      |
| Cyclin D1 <sup>K112, 114E</sup> sense primer:      | 5' GTGGCCTCTGAGATGGAGGAGACCATCCCC CT 3'          |
| Cyclin D1 <sup>T286A</sup> antisense primer:       | 5' TCGGTGGGTGCGCAAGCCAGGT 3'                     |
| Cyclin D1 <sup>T286A</sup> sense primer:           | 5' ACCTGGCTTGCGCACCCACC 3'                       |
| Cyclin D1 <sup>^cyclin box</sup> antisense primer: | 5' TGAGCTTGTT GGACGGCAGG ACCTCCTTCT 3'           |
| Cyclin D1 <sup>^cyclin box</sup> sense primer:     | 5' TCCTGCCGTC CAACAAGCTC AAGTGGAACC TG 3'        |
| Cyclin D1 cyclin box antisense primer:             | 5' AAG <u>TCGACC</u> ACCAGGAGCAGCTCCATT 3'       |
| Cyclin D1 cyclin box sense primer:                 | 5' AAG <u>AATTC</u> AT GCGGAAGATC GTCGCCACCT 3'  |
| Cyclin B1 <sup>^90</sup> upstream sense primer:    | 5' ATA <u>AGATCT</u> CCAGTGCCAGTGTCTGAGCCA 3'    |
| Cyclin B1 <sup>^90</sup> downstream antisense :    | 5' TG <u>AGTCGAC</u> TTACACCTTTGCCACAGCCTT 3'    |
| Cyclin D2 upstream sense primer:                   | 5' ATT <u>GAATTC</u> ATGGAGCTGCTGTGCCACGAG 3'    |
| Cyclin D2 downstream antisense primer:             | 5' ATT <u>GTCGAC</u> CAGGTCGATATCCCGCACGT 3'     |
| Cyclin D3 upstream sense primer:                   | 5' ATT <u>GAATTC</u> A TGGAGCTGCT GTGTTGCGAAG 3' |
| Cyclin D3 downstream antisense primer:             | 5' ATT <u>GTCGAC</u> CAGGTGTATGGCTGTGACATC 3'    |

|                                                  |                                                   |
|--------------------------------------------------|---------------------------------------------------|
| CDK4 upstream sense primer:                      | 5' GCAGA <u>AATTC</u> ATGGCTACCTCTCGATATGAG 3'    |
| CDK4 downstream antisense primer:                | 5' AAGTCGACCT CCGGATTACC TTCATCCTTA 3'            |
| CDK4_BamH I antisense primer:                    | 5' GCAGGATCCC TCCGGATTAC CTTCA 3'                 |
| CDK4 <sup>D158N</sup> sense primer:              | 5' AAGTTAGCCAGCTTGACTGT 3'                        |
| CDK4 <sup>D158N</sup> antisense primer:          | 5' AAGCTGGCTAACTTTGGCCT 3'                        |
| CDK4-3A sense sequence:                          | 5' ACGCGGCCGC TGCTCCCCAC AGTGGCC 3'               |
| CDK4-3A antisense sequence:                      | 5' GAGCAGCGGC CGCGTACACT GTCCCAT 3'               |
| CDK4 <sup>K22A</sup> sense sequence:             | 5' GTGTACGCGG CCCGTGATCC CC 3'                    |
| CDK4 <sup>K22A</sup> antisense sequence:         | 5' ATGGGACAGT GTACGCGGCC CG 3'                    |
| CDK6 upstream sense primer:                      | 5' GCAGA <u>AATTC</u> ATGGCTACCTCTCGATATGAG 3'    |
| CDK6 downstream antisense primer:                | 5' TATGTCGACGGCTGTATTCAGCTCCGAGGTG 3'             |
| p16 <sup>INK4</sup> upstream sense primer:       | 5' ATTGA <u>AATTC</u> A TGGAGCCGGC GGCAGGGGAGC 3' |
| p16 <sup>INK4</sup> downstream sense primer:     | 5' ATTGTCGACA TCGGGGATGT CTGAGGGAC 3'             |
| p21 <sup>CIP1</sup> upstream sense primer:       | 5' GAGA <u>AATTC</u> ATGTCAGAACCGGCTGGGGAT 3'     |
| p21 <sup>CIP1</sup> downstream antisense primer: | 5' AAGTCGACGGGCTTCCTCTTGGAGAAGAT 3'               |
| p27 <sup>KIP1</sup> upstream sense primer:       | 5' GGA <u>AATTC</u> ATGTCAAACGTGCGAGTGTCTA 3'     |
| p27 <sup>KIP1</sup> downstream antisense primer: | 5' AAGTCGACCGTTTGACGTCTTCTGAGGCCA 3'              |
